# Supplementary material for: RNA Secondary Structure-Based Design of Antisense Peptide Nucleic Acids for Modulating Disease-Associated Aberrant Tau Pre-mRNA Alternative Splicing
Source: PubMed Central journal article supplement (PMC6720520; doi:10.3390/molecules24163020), 2019-08-20
Supplement: molecules-24-03020-s001.pdf [file molecules-24-03020-s001.pdf]

# **RNA Secondary Structure-Based Design of Antisense Peptide Nucleic Acids for Modulating Disease-Associated Aberrant Tau pre-mRNA Alternative Splicing**

**Alan Ann Lerk Ong** <sup>1,2,†</sup>, **Jiazi Tan** <sup>2,†</sup>, **Malini Bhadra** <sup>3</sup>, **Clément Dezanet** <sup>4</sup>, **Kiran M. Patil** <sup>2</sup>, **Mei Sian Chong** <sup>5</sup>, **Ryszard Kierzek** <sup>6</sup>, **Jean-Luc Decout** <sup>4</sup>, **Xavier Roca** <sup>3</sup> and **Gang Chen** <sup>2,\*</sup>

<sup>1</sup> NTU Institute for Health Technologies (HeathTech NTU), Interdisciplinary Graduate School, Nanyang Technological University, 50 Nanyang Drive, Singapore 637553, Singapore

<sup>2</sup> Division of Chemistry and Biological Chemistry, School of Physical and Mathematical Sciences, Nanyang Technological University, 21 Nanyang Link, Singapore 637371, Singapore

<sup>3</sup> School of Biological Sciences, Nanyang Technological University, Singapore 637551, Singapore

<sup>4</sup> University Grenoble Alpes/CNRS, Département de Pharmacochimie Moléculaire, ICMG FR 2607, UMR 5063, 470 Rue de la Chimie, F-38041 Grenoble, France

<sup>5</sup> Geriatric Education & Research Institute, 2 Yishun Central 2, Singapore 768024, Singapore

<sup>6</sup> Institute of Bioorganic Chemistry, Polish Academy of Sciences, Noskowskiego 12/14, 61-704 Poznan, Poland

\* Correspondence: RNACHEN@ntu.edu.sg; Tel: +65 6592 2549; Fax: +65 6791 1961

† These authors contributed equally to this work.

## Table of Contents

|                                                  |         |
|--------------------------------------------------|---------|
| 1. Table S1 and Figure S1: MALDI-TOF data        | S3-S8   |
| 2. Figures S2 and S3: Nondenaturing PAGE results | S9-S10  |
| 3. Figure S4: Real-time PCR data                 | S11-S12 |

## 2. MALDI-TOF of PNA oligomers

**Table S1.** Sequences and MALDI-TOF data for synthesized PNAs and PNA-neamine conjugates.

| PNA               | Sequence                                                    | Molecular Formula                                                 | Calculated MW | Observed MW |
|-------------------|-------------------------------------------------------------|-------------------------------------------------------------------|---------------|-------------|
| asPNA(+8/+18)     | NH <sub>2</sub> -Lys-ACGTGTGAAGG-CONH <sub>2</sub>          | C <sub>126</sub> H <sub>172</sub> N <sub>72</sub> O <sub>33</sub> | 3211.3        | 3212.5      |
| asPNA(-8/+2)      | NH <sub>2</sub> -Lys-ACACTGCCGC-CONH <sub>2</sub>           | C <sub>111</sub> H <sub>146</sub> N <sub>60</sub> O <sub>30</sub> | 2799.2        | 2801.3      |
| asPNA(-8/+7)      | NH <sub>2</sub> -Lys-TACTCACA CTGCCGC-CONH <sub>2</sub>     | C <sub>164</sub> H <sub>213</sub> N <sub>85</sub> O <sub>46</sub> | 4108.7        | 4109.7      |
| asPNA(-9/+3)      | NH <sub>2</sub> -Lys-CACA CTGCCGCC-CONH <sub>2</sub>        | C <sub>131</sub> H <sub>172</sub> N <sub>70</sub> O <sub>36</sub> | 3301.4        | 3302.4      |
| asPNA(-9/+4)      | NH <sub>2</sub> -Lys-TCACA CTGCCGCC-CONH <sub>2</sub>       | C <sub>142</sub> H <sub>186</sub> N <sub>74</sub> O <sub>40</sub> | 3567.5        | 3568.6      |
| asPNA(+8/+18)-Nea | NH <sub>2</sub> -Nea-Lys-ACGTGTGAAGG-CONH <sub>2</sub>      | C <sub>148</sub> H <sub>203</sub> N <sub>77</sub> O <sub>41</sub> | 3714.6        | 3717.2      |
| asPNA(-8/+2)-Nea  | NH <sub>2</sub> -Nea-Lys-ACACTGCCGC-CONH <sub>2</sub>       | C <sub>133</sub> H <sub>187</sub> N <sub>65</sub> O <sub>38</sub> | 3302.5        | 3303.5      |
| asPNA(-8/+7)-Nea  | NH <sub>2</sub> -Nea-Lys-TACTCACA CTGCCGC-CONH <sub>2</sub> | C <sub>186</sub> H <sub>254</sub> N <sub>90</sub> O <sub>54</sub> | 4612.0        | 4616.9      |
| asPNA(-9/+3)-Nea  | NH <sub>2</sub> -Nea-Lys-CACA CTGCCGCC-CONH <sub>2</sub>    | C <sub>153</sub> H <sub>213</sub> N <sub>75</sub> O <sub>44</sub> | 3804.7        | 3805.7      |
| asPNA(-9/+4)-Nea  | NH <sub>2</sub> -Nea-Lys-TCACA CTGCCGCC-CONH <sub>2</sub>   | C <sub>164</sub> H <sub>227</sub> N <sub>79</sub> O <sub>48</sub> | 4070.8        | 4071.9      |

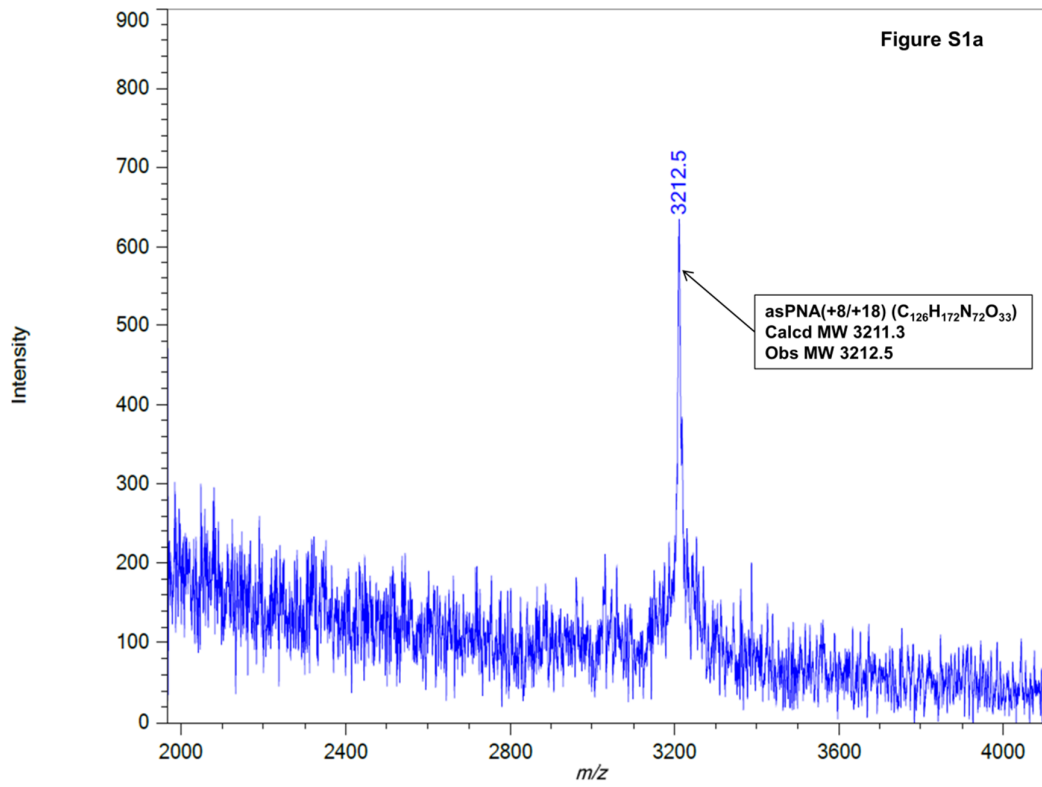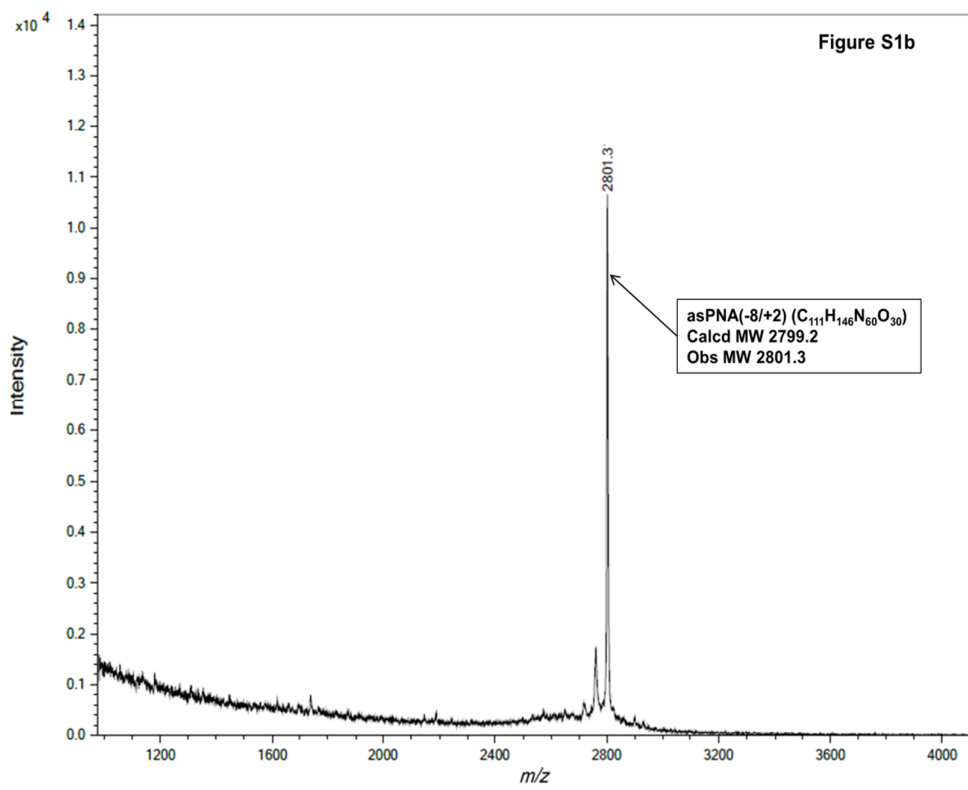

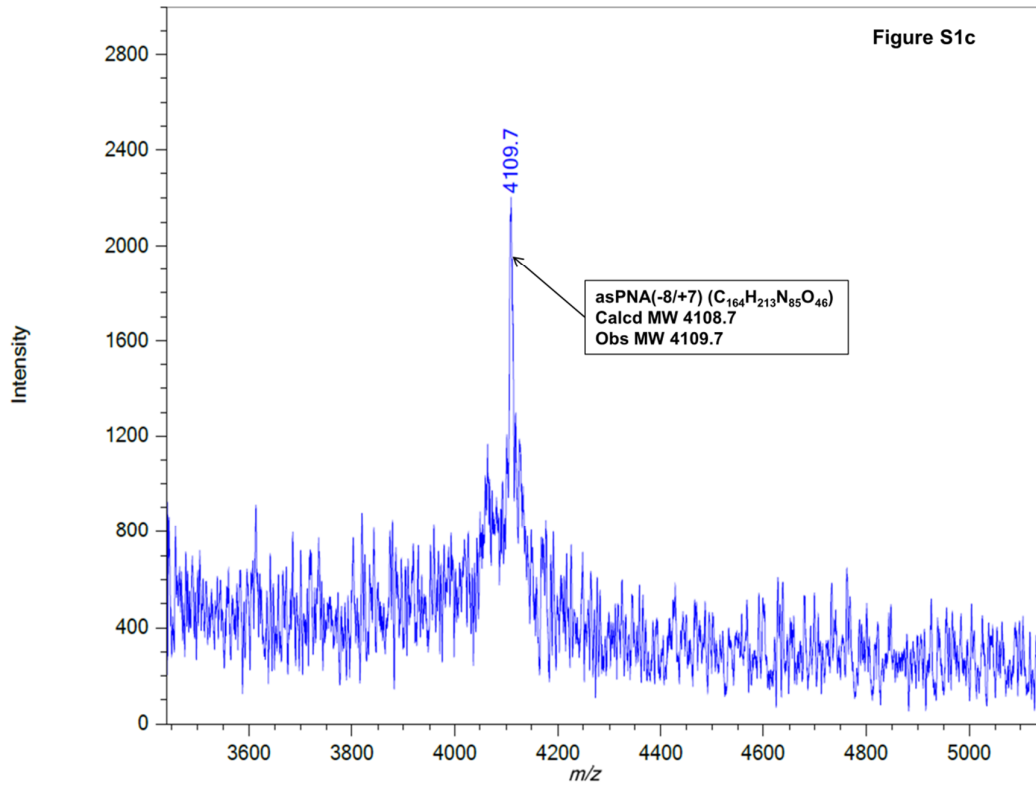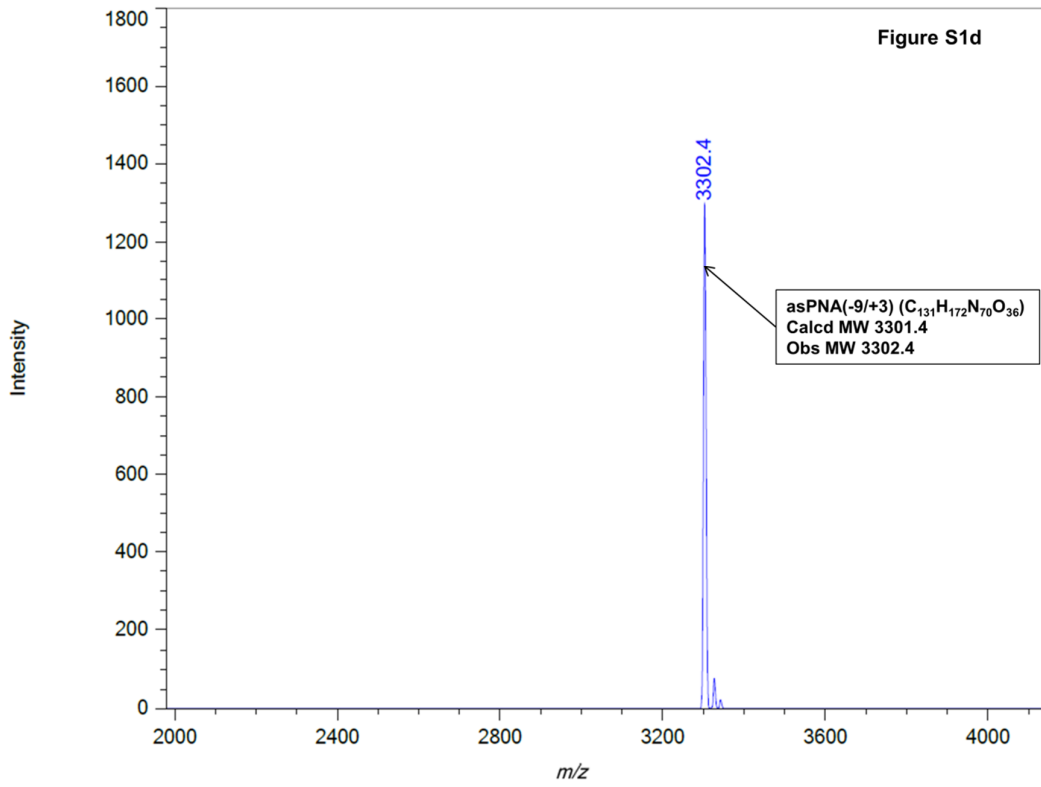

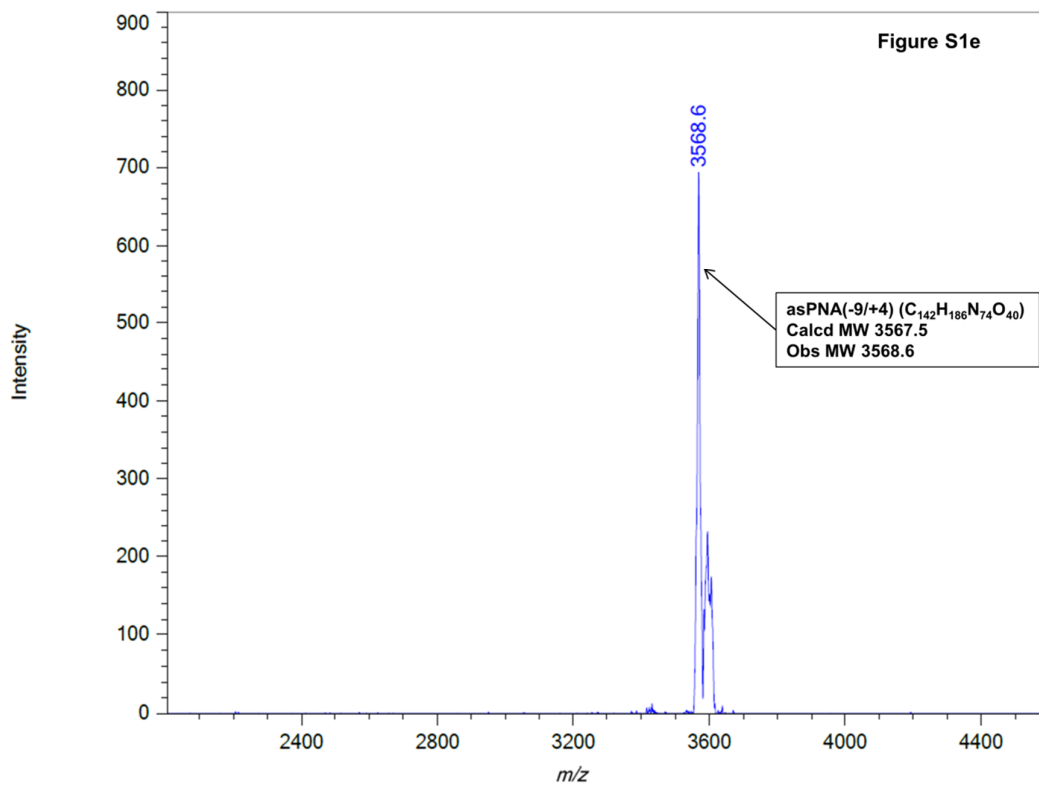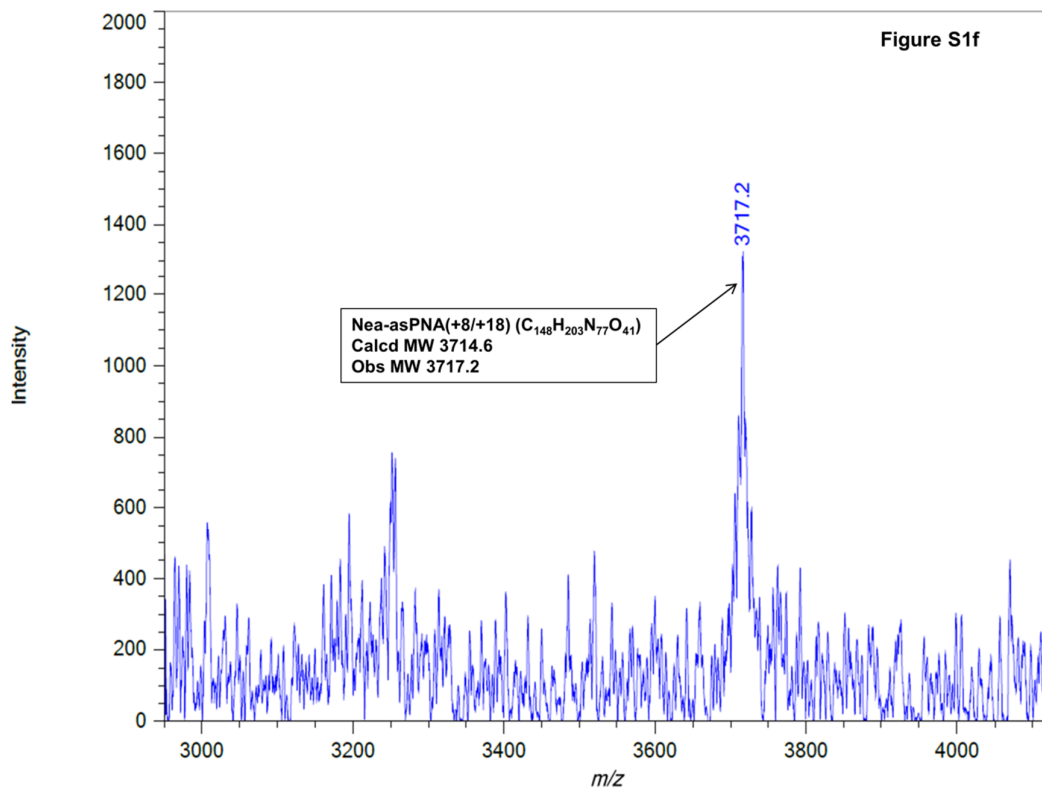

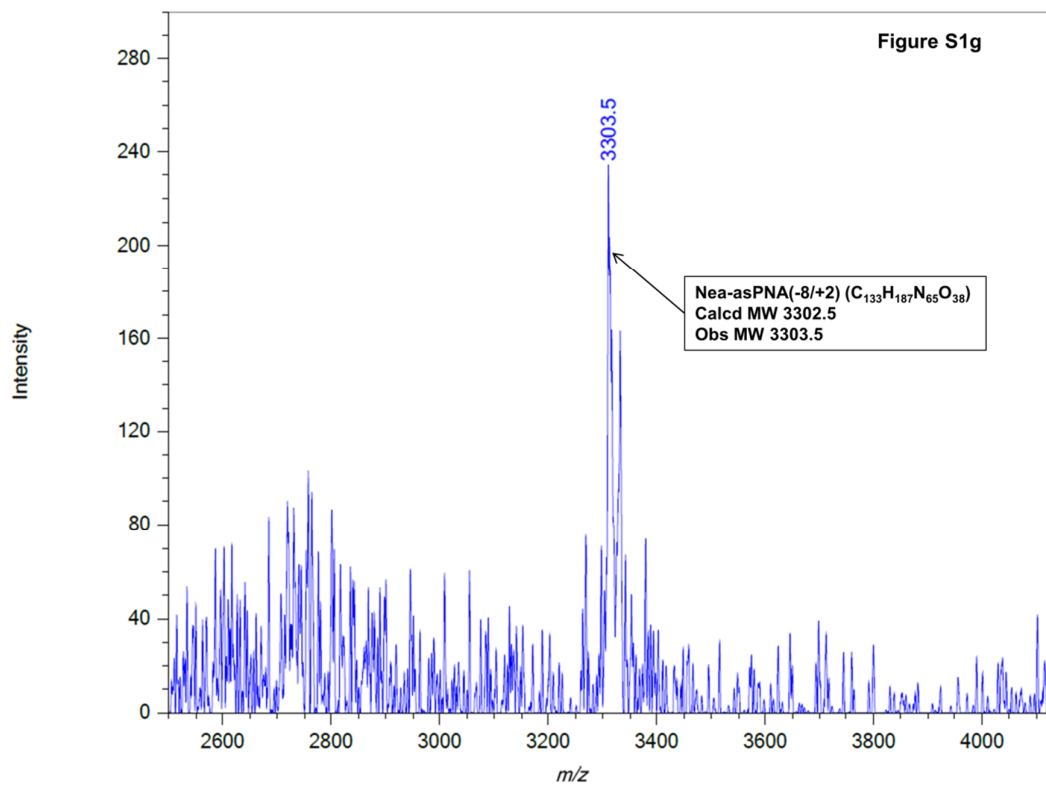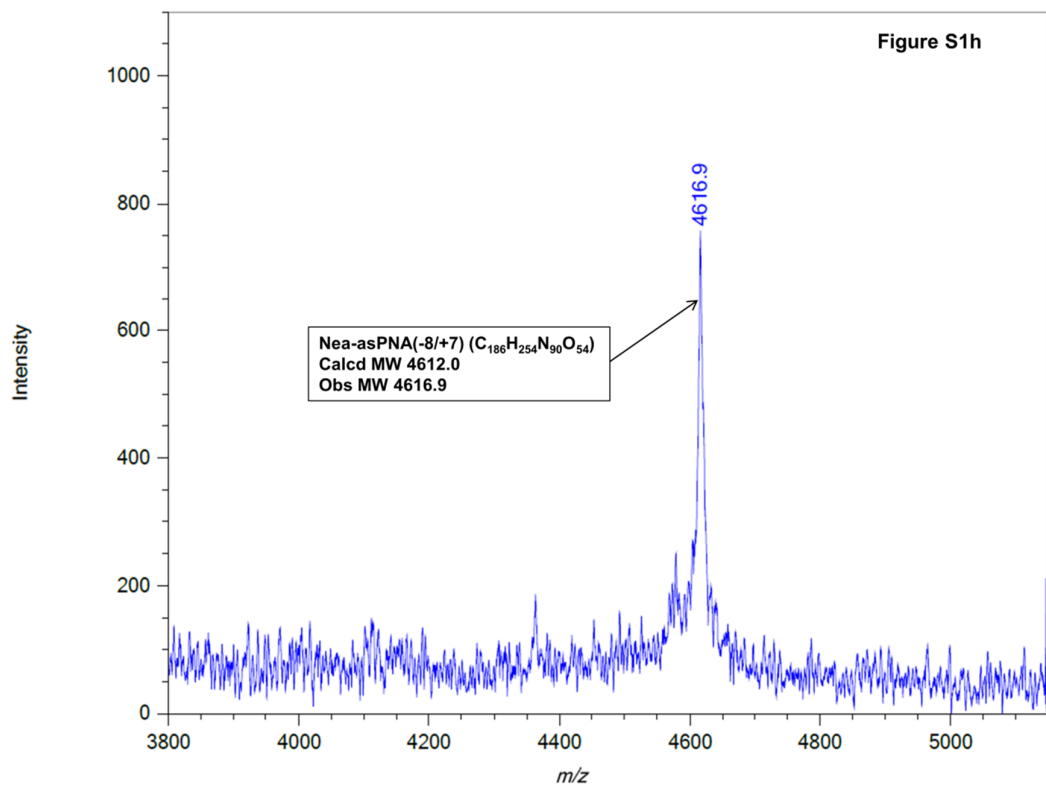

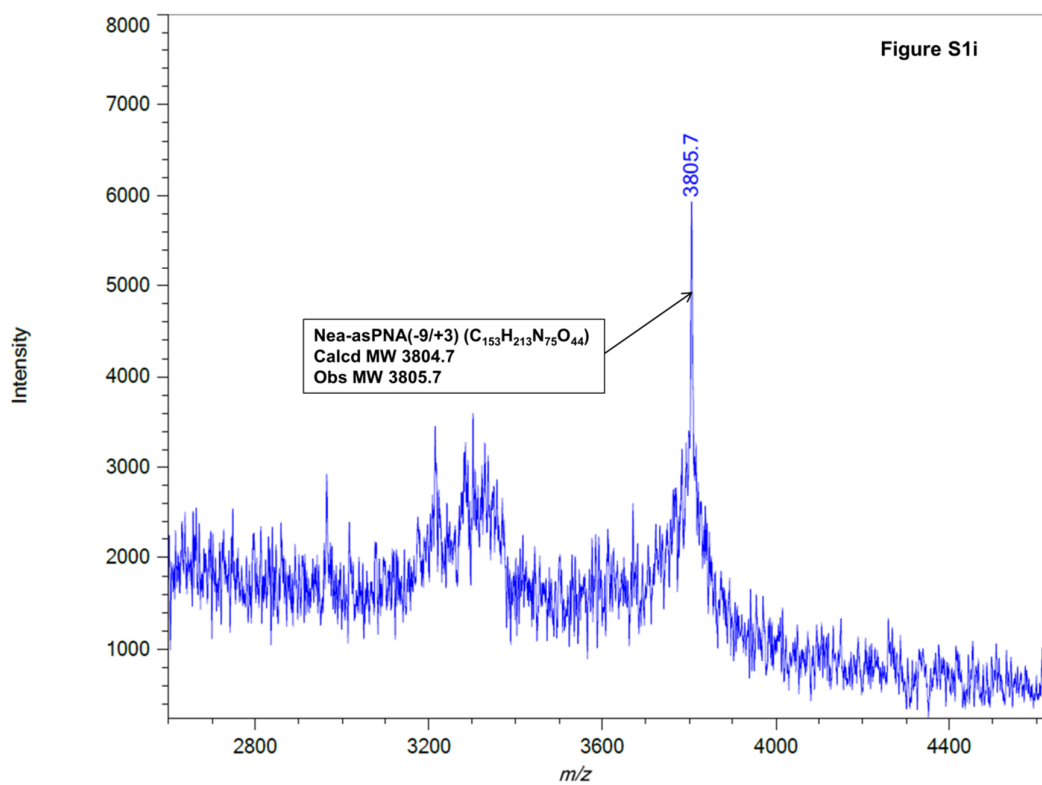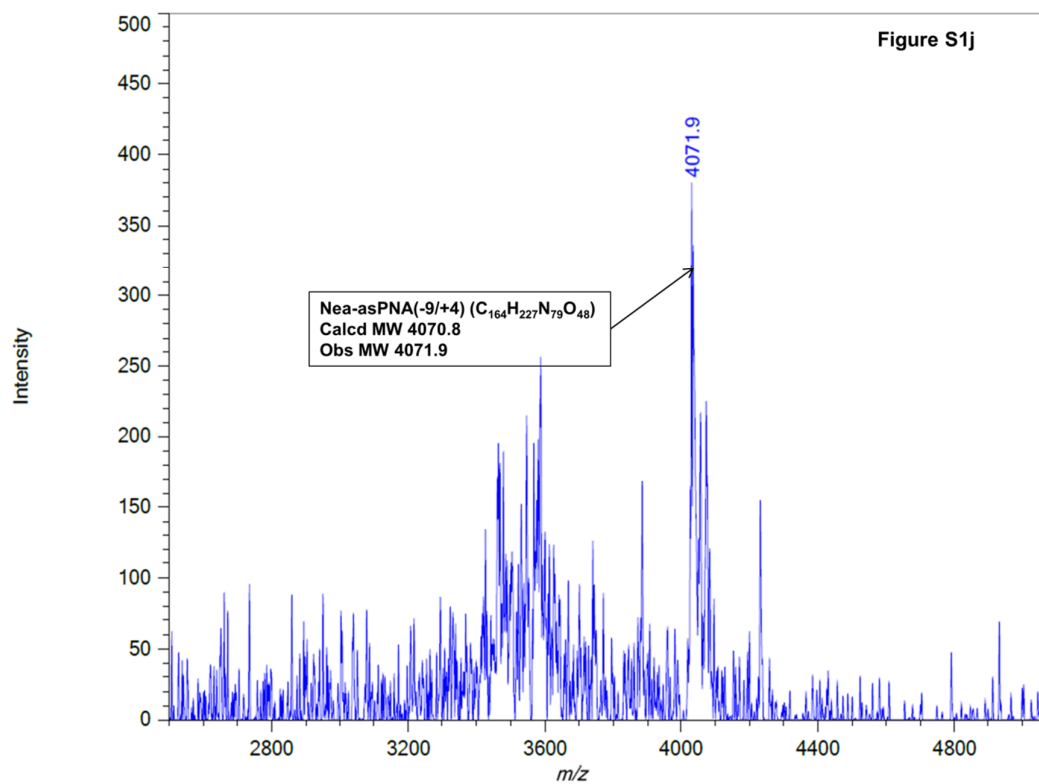

**Figure S1.** MALDI-TOF data of PNAs and PNA-neamine conjugates studied in this paper.



### 3. Non-denaturing PAGE results

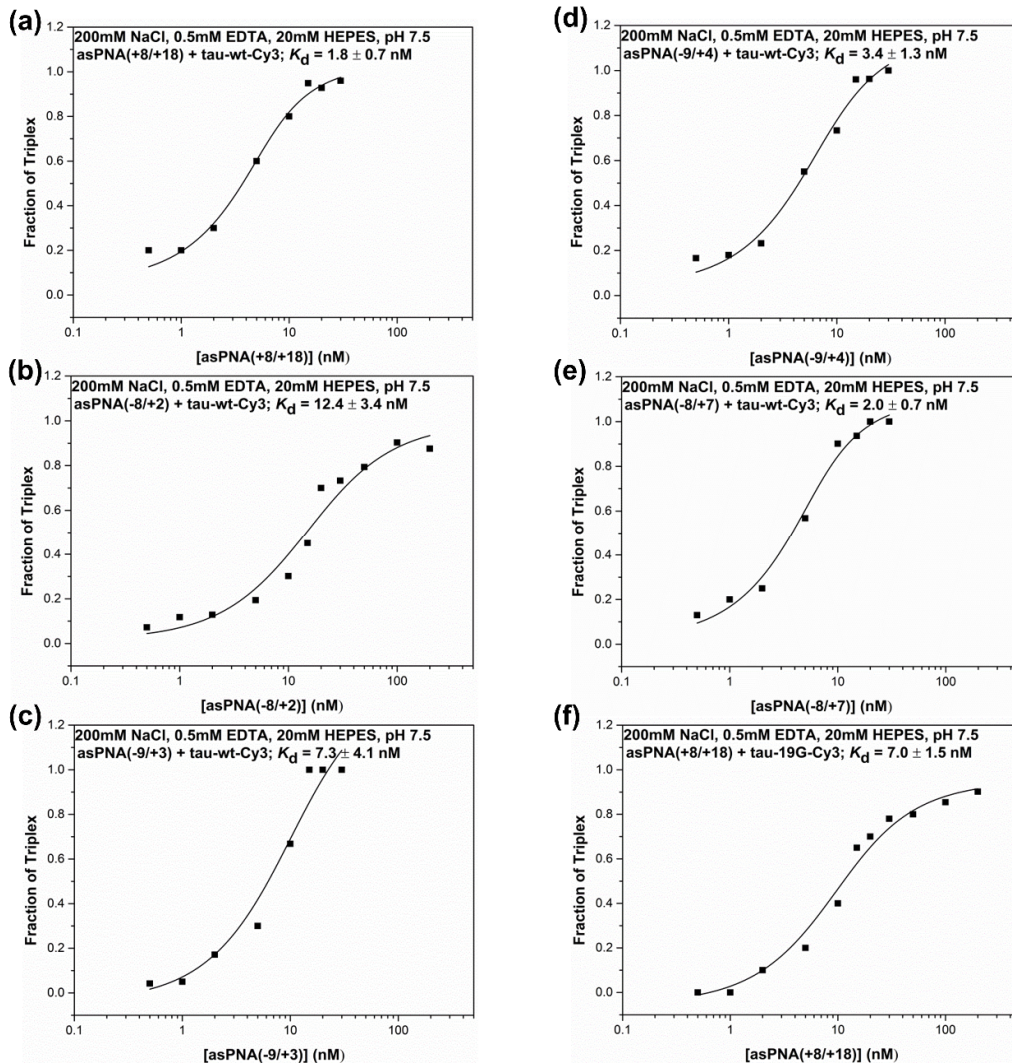

**Figure S2.**  $K_d$  determination by nondenaturing PAGE for various PNAs binding to tau pre-mRNA hairpins. The fraction of RNA-PNA complex formation was calculated based on the band intensities. The data were fit to the equation:  $Y = Y_0 + (B/2/R_0)(R_0 + X + K_d - ((R_0 + X + K_d)^2 - 4R_0X)^{1/2})$  where  $R_0$  is the RNA hairpin concentration (5 nM).  $Y_0$  and  $B$  are the minimum and maximum fraction of triplex formation respectively.  $X$  is the total PNA concentration and  $K_d$  is the dissociation constant. For panels a, c-e, the points at the highest concentrations (50, 100 and 200 nM) are removed to avoid over fitting of the high-concentration base lines.



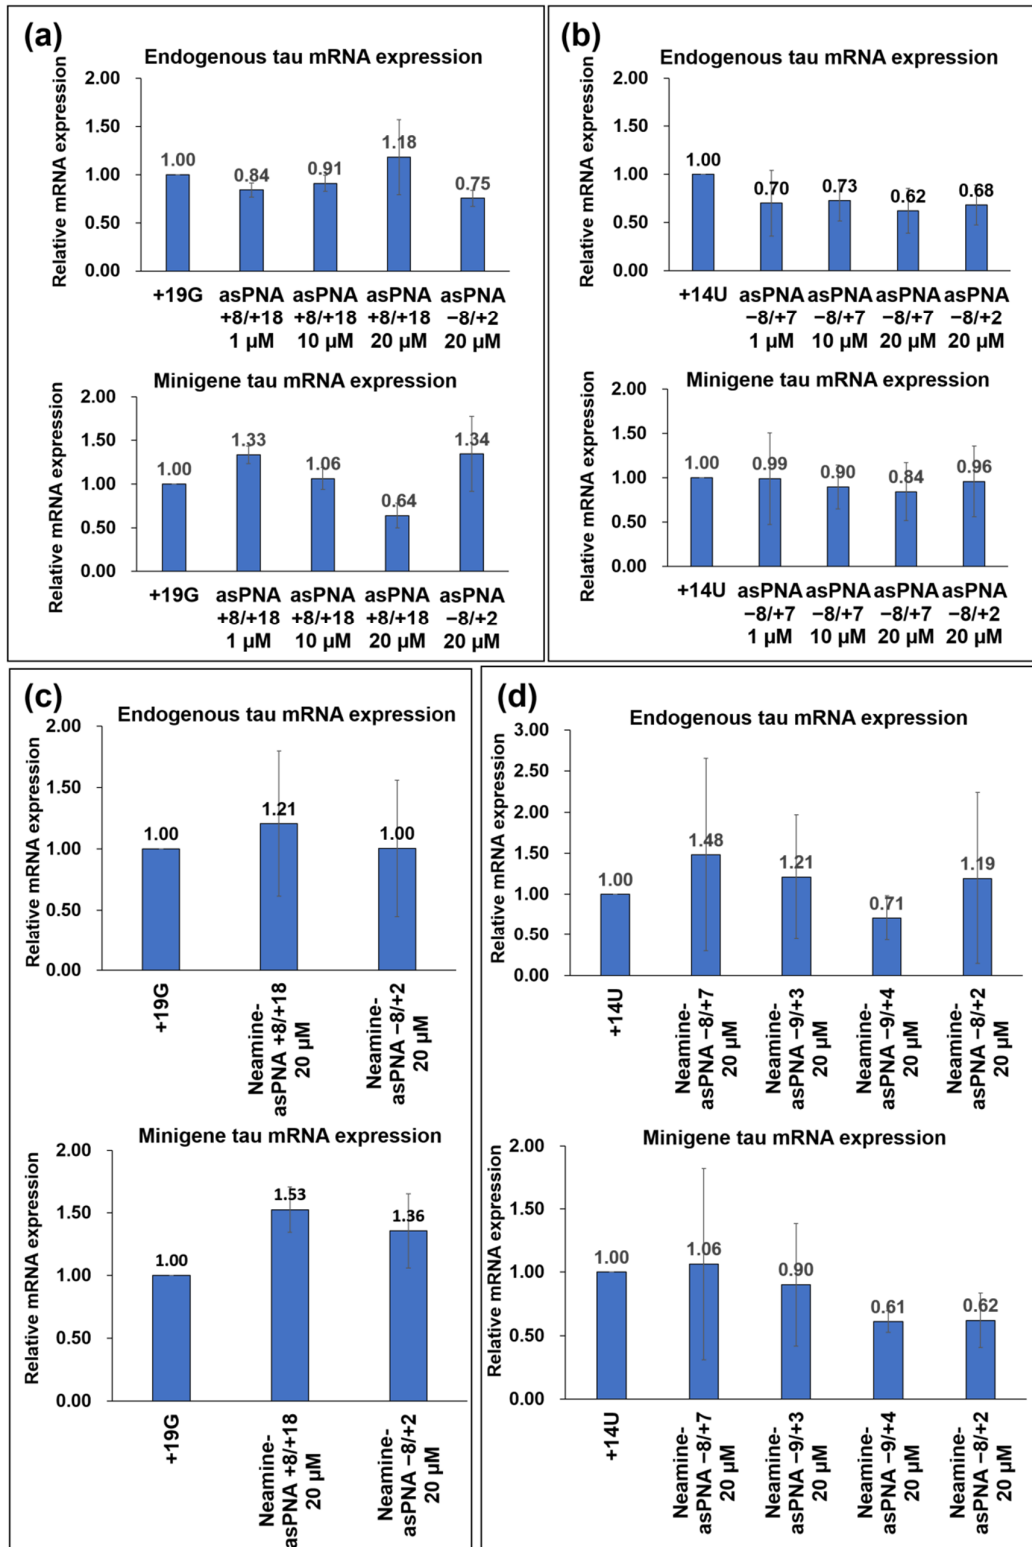

**Figure S4:** Real-time PCR data showing the transcript levels of endogenous tau and minigenes. (a) Co-transfection of +19G minigene with asPNAs (method A). (b) Co-transfection of minigene +14U and asPNAs (method A). (c) Transfection of minigene +19G, followed by the application of asPNA-neamine conjugates (method B). (d)

Transfection of minigene +14U, followed by the application of asPNA-neamine conjugates (method B). The experiments were performed in triplicates and the data are shown as mean  $\pm$  standard deviation. Student's t-test was performed with adjusted P-values using Bonferroni correction [P = 0.0125 for (a), (b), (d); P = 0.025 for (c)].
